# Supplementary material
Source: PubMed Central journal article supplement (PMC7757707)
Supplement: Supp_Fig1.pdf [file Supp_Fig1.pdf]

## Supplementary Data

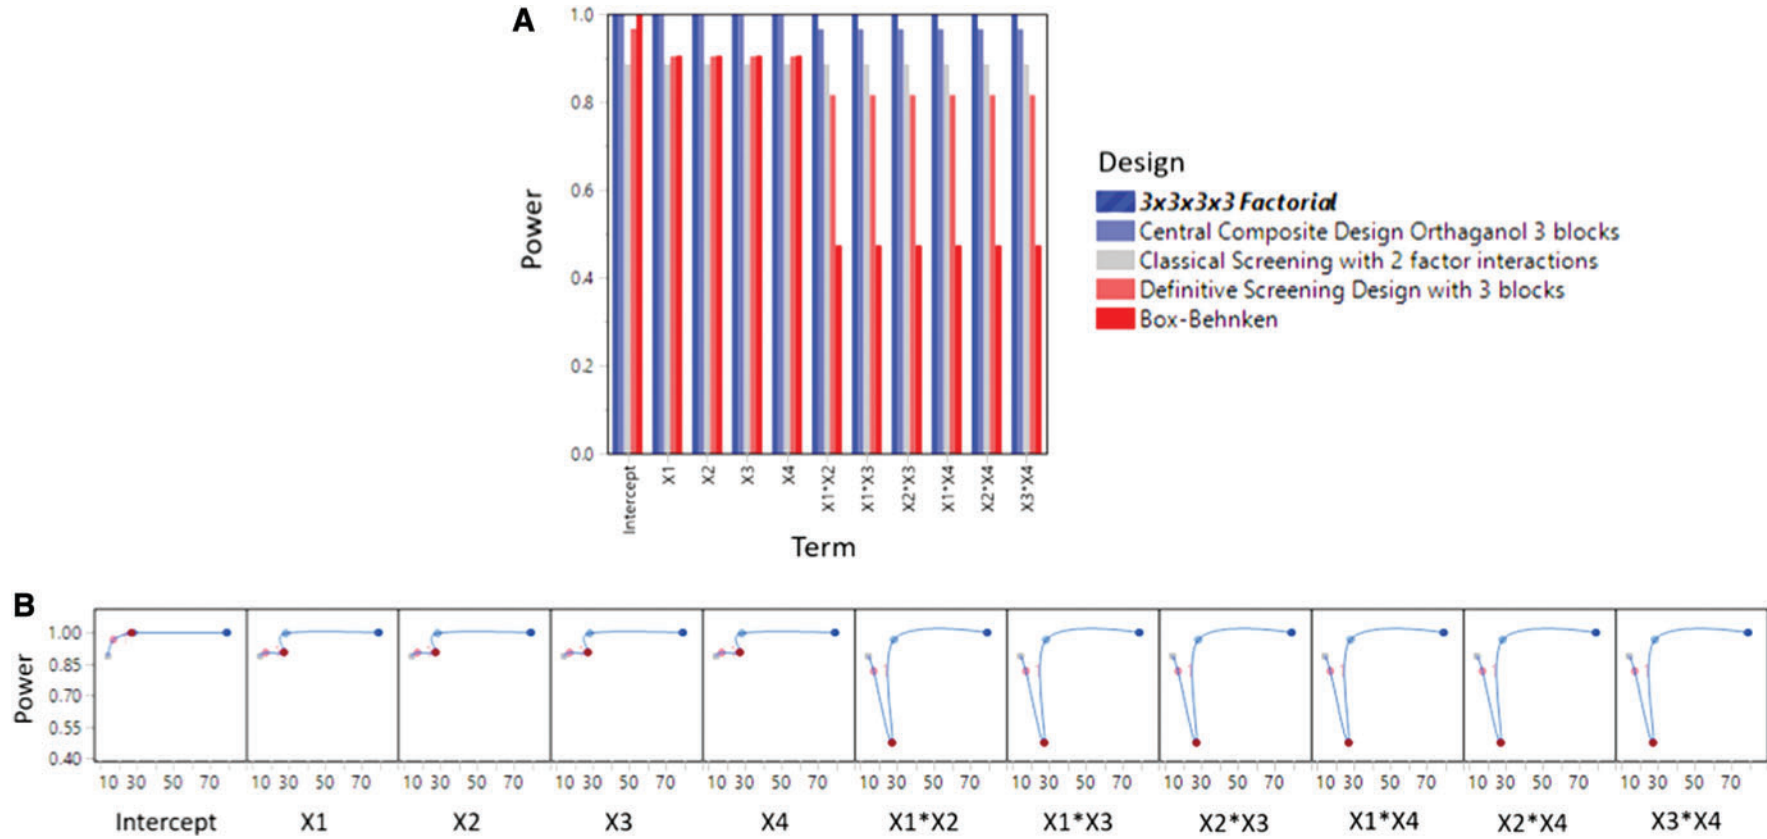

**SUPPLEMENTARY FIG. S1.** Contrast of experimental designs to the reference  $3 \times 3 \times 3 \times 3$  factorial design. The power plot (A) shows the statistical power of five distinct experimental designs. The power versus sample size plot (B) shows the number of runs required to achieve a given level of statistical power for the different terms.
