# Supplementary material
Source: PubMed Central journal article supplement (PMC7757707)
Supplement: Supp_Table1.pdf [file Supp_Table1.pdf]

SUPPLEMENTARY TABLE S1. DESCRIPTION OF EXPERIMENTAL RUNS REQUIRED FOR THE CLASSICAL SCREENING EXPERIMENTAL DESIGN AS DEFINED BY JMP

| <i>Run</i> | <i>Pattern</i> | <i>Time (h)</i> | <i>pH</i> | <i>Ionic strength (mM)</i> | <i>Protein:polymer (wt%)</i> |
|------------|----------------|-----------------|-----------|----------------------------|------------------------------|
| 1          | +++            | 2               | 7.5       | 5                          | 10                           |
| 2          | +++            | 2               | 4.5       | 154                        | 10                           |
| 3          | +++            | 2               | 7.5       | 154                        | 3                            |
| 4          | ---            | 2               | 4.5       | 5                          | 3                            |
| 5          | +-             | 2               | 7.5       | 5                          | 3                            |
| 6          | -+             | 2               | 4.5       | 154                        | 3                            |
| 7          | ++             | 2               | 4.5       | 5                          | 10                           |
| 8          | +++            | 2               | 7.5       | 154                        | 10                           |
| 9          | 0A00           | 24              | 7.5       | 79.5                       | 6.5                          |
| 10         | 00A0           | 24              | 6         | 154                        | 6.5                          |
| 11         | 000A           | 24              | 6         | 79.5                       | 13.5                         |
| 12         | 0a00           | 24              | 4.5       | 79.5                       | 6.5                          |
| 13         | 0              | 24              | 6         | 79.5                       | 6.5                          |
| 14         | 00a0           | 24              | 6         | 5                          | 6.5                          |
| 15         | +++            | 48              | 4.5       | 5                          | 10                           |
| 16         | ++++           | 48              | 7.5       | 154                        | 10                           |
| 17         | +++            | 48              | 4.5       | 154                        | 10                           |
| 18         | +++            | 48              | 7.5       | 154                        | 3                            |
| 19         | +++            | 48              | 7.5       | 5                          | 10                           |
| 20         | ++             | 48              | 7.5       | 5                          | 3                            |
| 21         | +-             | 48              | 4.5       | 5                          | 3                            |
| 22         | -+             | 48              | 4.5       | 154                        | 3                            |
| 23         | A000           | 72              | 6         | 79.5                       | 6.5                          |
